# Supplementary material for: Functional analysis of the 11q23.3 glioma susceptibility locus implicates PHLDB1 and DDX6 in glioma susceptibility
Source: PubMed Central journal article supplement (PMC4661592; doi:10.1038/srep17367), 2015-11-27
Supplement: srep17367-s1.pdf [file srep17367-s1.pdf]

# Supplementary Material

## Functional analysis of the 11q23.3 glioma susceptibility locus implicates *PHLDB1* and *DDX6* in glioma susceptibility

Rebekah Baskin<sup>1</sup>, Nicholas T. Woods<sup>1,2</sup>, Gustavo Mendoza-Fandiño<sup>1</sup>, Peter Forsyth<sup>3</sup>, Kathleen M. Egan<sup>1</sup>, Alvaro N.A. Monteiro<sup>1</sup>

<sup>1</sup>Cancer Epidemiology Program, H. Lee Moffitt Cancer Center and Research Institute, Tampa, FL, USA

<sup>2</sup>Eppley Institute for Research in Cancer, University of Nebraska Medical Center, Omaha, NE 68198, USA

<sup>3</sup>Department of Neuro-oncology, H. Lee Moffitt Cancer Center and Research Institute, Tampa, FL, USA

Correspondence should be addressed to:  
Alvaro N. Monteiro  
H. Lee Moffitt Cancer Center & Research Institute  
12902 Magnolia Drive, Tampa, FL 33612, USA.  
Phone: 813-7456321 Fax: 813-9036847  
E-mail: alvaro.monteiro@moffitt.org

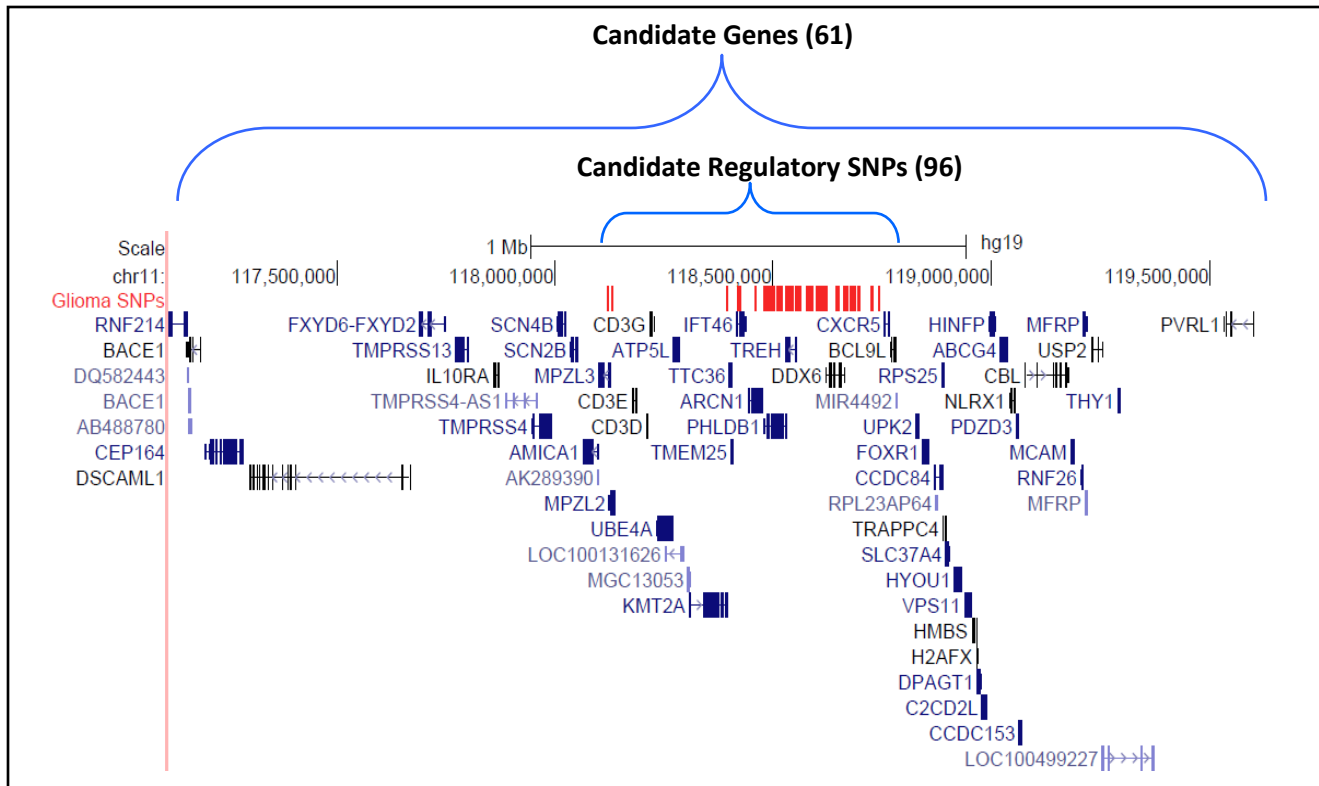

**Supplementary Figure 1: All genes and candidate SNPs within the 11q23.3 glioma susceptibility locus.** Candidate regulatory SNPs are shown as light blue tick marks. A 1Mb boundary was established on either end of the outermost SNPs. The total 2.6Mb region includes 61 candidate genes.

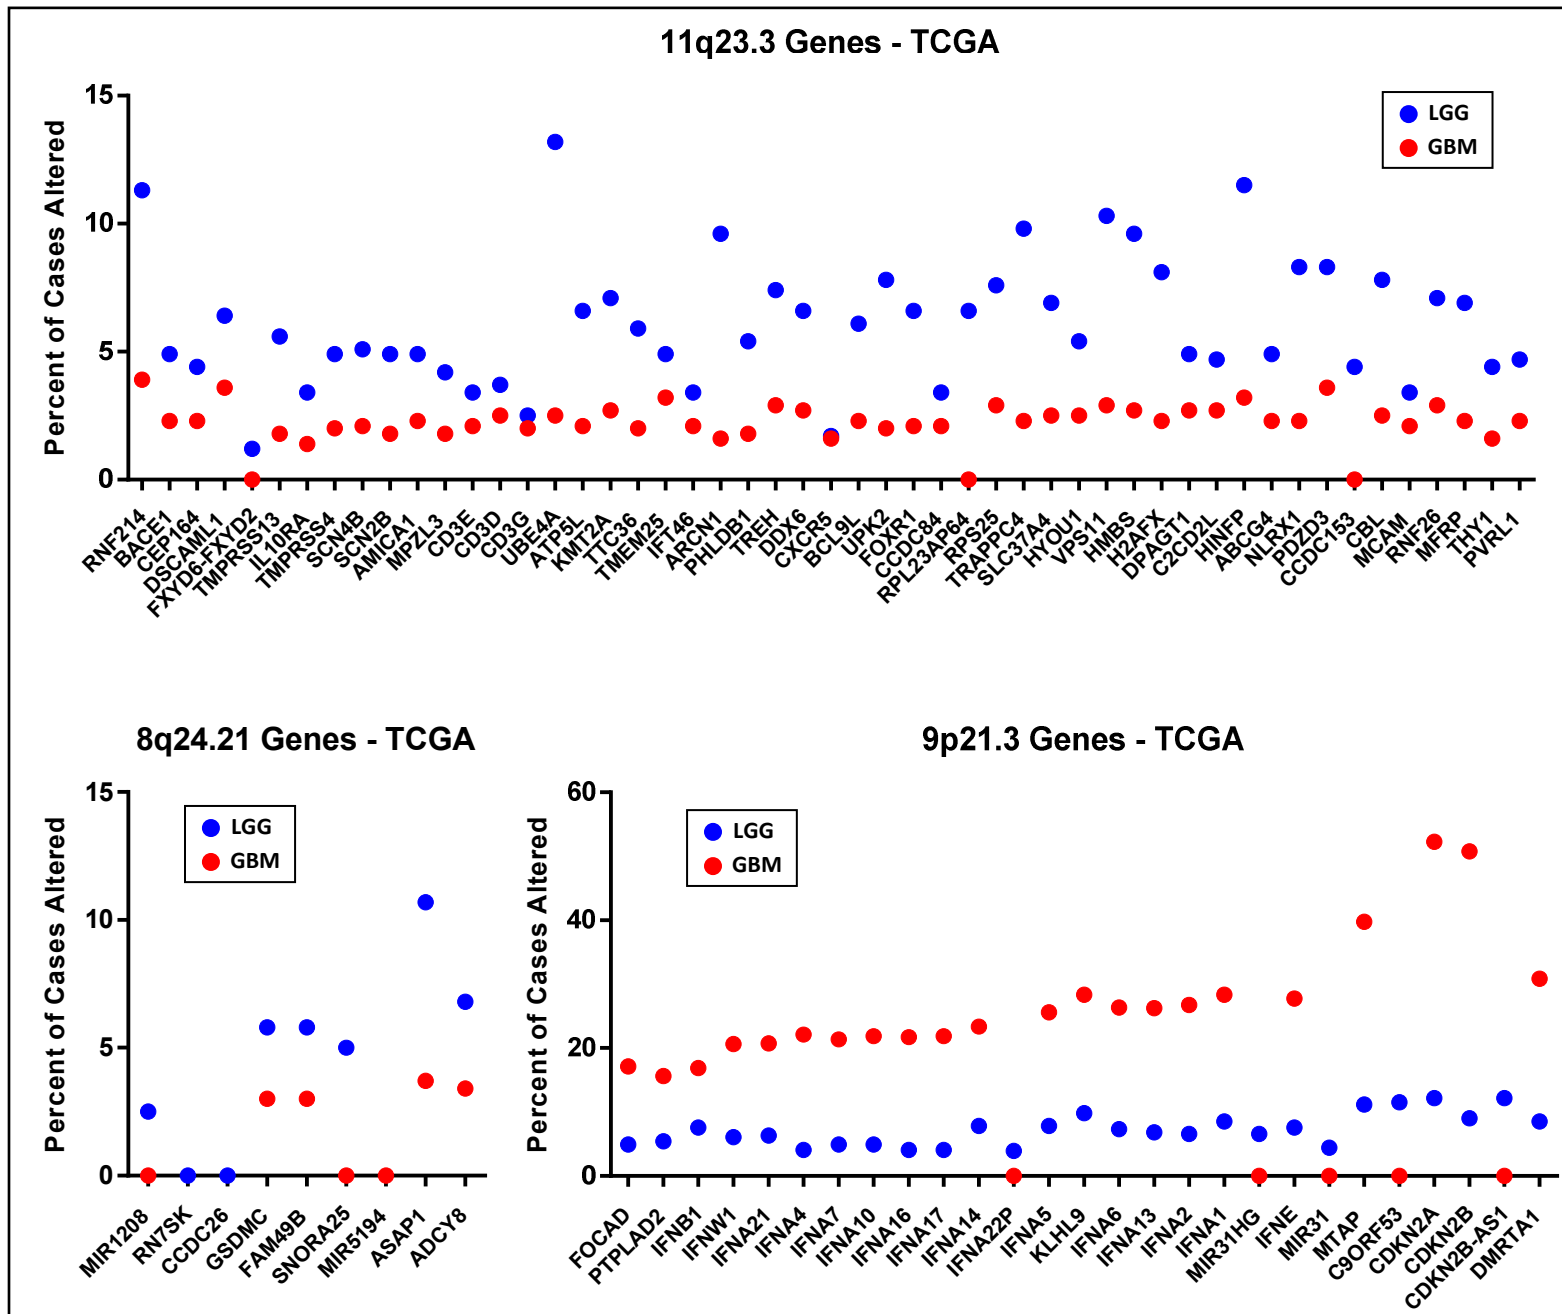

**Supplementary Figure 2: Role of 11q23.3 locus genes in cancer.** Gene lists were entered into TCGA cBioPortal database searches to obtain mutation, CNV and expression data. The frequency of alterations in each gene were compared between LGG and GBM cases for 11q23.3, 8q24.21 and 9p21.3 glioma loci.

|             | COSMIC mutations |       |           |       |          |       |             | ENCODE                   |                |
|-------------|------------------|-------|-----------|-------|----------|-------|-------------|--------------------------|----------------|
|             | missense         |       | insertion |       | deletion |       |             | Promoter marks<br>in NHA | RNA-seq in U87 |
|             | any              | brain | any       | brain | any      | brain |             |                          |                |
| RNF214      | +                | -     | -         | -     | -        | -     | RNF214      | +                        | +              |
| BACE1       | +                | -     | -         | -     | +        | -     | BACE1       | +                        | +              |
| CEP164      | +                | -     | +         | -     | +        | -     | CEP164      | +                        | +              |
| DSCAML1     | +                | +     | +         | +     | +        | -     | DSCAML1     | +                        | -              |
| FXYD6-FXYD2 | -                | -     | -         | -     | -        | -     | FXYD6-FXYD2 | -                        | -              |
| TMPRSS13    | +                | -     | +         | -     | -        | -     | TMPRSS13    | -                        | -              |
| IL10RA      | +                | -     | -         | -     | -        | -     | IL10RA      | -                        | -              |
| TMPRSS4     | +                | +     | -         | -     | -        | -     | TMPRSS4     | -                        | -              |
| SCN4B       | +                | -     | -         | -     | -        | -     | SCN4B       | -                        | -              |
| SCN2B       | +                | -     | -         | -     | +        | -     | SCN2B       | -                        | -              |
| AMICA1      | +                | +     | -         | -     | -        | -     | AMICA1      | -                        | +              |
| MPZL3       | +                | +     | -         | -     | -        | -     | MPZL3       | +                        | -              |
| CD3E        | +                | -     | -         | -     | -        | -     | CD3E        | -                        | -              |
| CD3D        | +                | -     | -         | -     | -        | -     | CD3D        | -                        | -              |
| CD3G        | +                | -     | -         | -     | +        | -     | CD3G        | -                        | -              |
| UBE4A       | +                | -     | -         | -     | +        | -     | UBE4A       | +                        | +              |
| ATP5L       | +                | -     | -         | -     | -        | -     | ATP5L       | +                        | +              |
| KMT2A       | +                | +     | +         | -     | +        | -     | KMT2A       | +                        | +              |
| TTC36       | +                | -     | -         | -     | -        | -     | TTC36       | +                        | -              |
| TMEM25      | +                | -     | +         | -     | +        | -     | TMEM25      | +                        | -              |
| IFT46       | +                | -     | +         | -     | -        | -     | IFT46       | +                        | +              |
| ARCN1       | +                | -     | -         | -     | +        | +     | ARCN1       | +                        | +              |
| PHLDB1      | +                | +     | -         | -     | +        | +     | PHLDB1      | +                        | +              |
| TREH        | +                | -     | -         | -     | -        | -     | TREH        | -                        | -              |
| DDX6        | +                | +     | -         | -     | +        | -     | DDX6        | +                        | +              |
| CXCR5       | +                | -     | -         | -     | +        | -     | CXCR5       | -                        | -              |
| BCL9L       | +                | +     | +         | -     | +        | -     | BCL9L       | +                        | +              |
| UPK2        | +                | -     | -         | -     | +        | -     | UPK2        | -                        | -              |
| FOXR1       | +                | -     | -         | -     | -        | -     | FOXR1       | -                        | -              |
| CCDC84      | +                | -     | -         | -     | -        | -     | CCDC84      | +                        | +              |
| RPL23AP64   | -                | -     | -         | -     | -        | -     | RPL23AP64   | +                        | +              |
| RPS25       | +                | -     | -         | -     | -        | -     | RPS25       | +                        | +              |
| TRAPPC4     | +                | -     | -         | -     | -        | -     | TRAPPC4     | +                        | +              |
| SLC37A4     | +                | -     | -         | -     | -        | -     | SLC37A4     | +                        | +              |
| HYOU1       | +                | -     | -         | -     | +        | +     | HYOU1       | +                        | +              |
| VPS11       | +                | +     | -         | -     | +        | +     | VPS11       | +                        | +              |
| HMBS        | +                | -     | -         | -     | -        | -     | HMBS        | +                        | +              |
| H2AFX       | +                | -     | -         | -     | -        | -     | H2AFX       | +                        | +              |
| DPAGT1      | +                | -     | -         | -     | +        | -     | DPAGT1      | +                        | +              |
| C2CD2L      | +                | -     | -         | -     | +        | -     | C2CD2L      | +                        | +              |
| HINFP       | +                | -     | -         | -     | -        | -     | HINFP       | +                        | +              |
| ABCG4       | +                | +     | -         | -     | +        | -     | ABCG4       | +                        | -              |
| NLRX1       | +                | -     | +         | -     | +        | -     | NLRX1       | +                        | +              |
| PDZD3       | +                | +     | -         | -     | +        | -     | PDZD3       | -                        | -              |
| CCDC153     | +                | +     | +         | -     | -        | -     | CCDC153     | -                        | -              |
| CBL         | +                | +     | -         | -     | -        | -     | CBL         | +                        | +              |
| MCAM        | +                | +     | -         | -     | -        | -     | MCAM        | +                        | +              |
| RNF26       | +                | -     | -         | -     | -        | -     | RNF26       | +                        | +              |
| MFRP        | +                | -     | +         | -     | +        | -     | MFRP        | -                        | -              |
| THY1        | +                | -     | -         | -     | +        | +     | THY1        | +                        | +              |
| PVRL1       | +                | -     | +         | -     | +        | -     | PVRL1       | +                        | +              |

**Supplementary Figure 3: Somatic mutations and expression of 11q23.3 locus genes.** Gene lists were entered into COSMIC database searches to obtain mutation data. Genes are listed in order from centromere to telomere. Gene promoter regions were visually inspected using available ENCODE data for promoter marks (H3K4me3) in NHA and RNA-seq in U87.

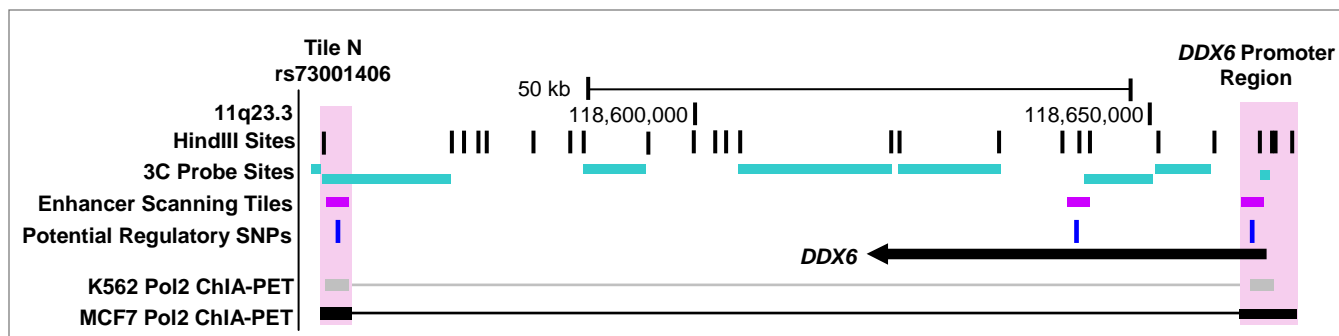

**Supplementary Figure 4: ChIA-PET at the 11q23.3 locus.** ENCODE was used to search for ChIA-PET data from available cell lines at the 11q23.3 locus. Shown are Pol2 ChIA-PET results for K562 and MCF7 cell lines at the 11q23.3 locus.

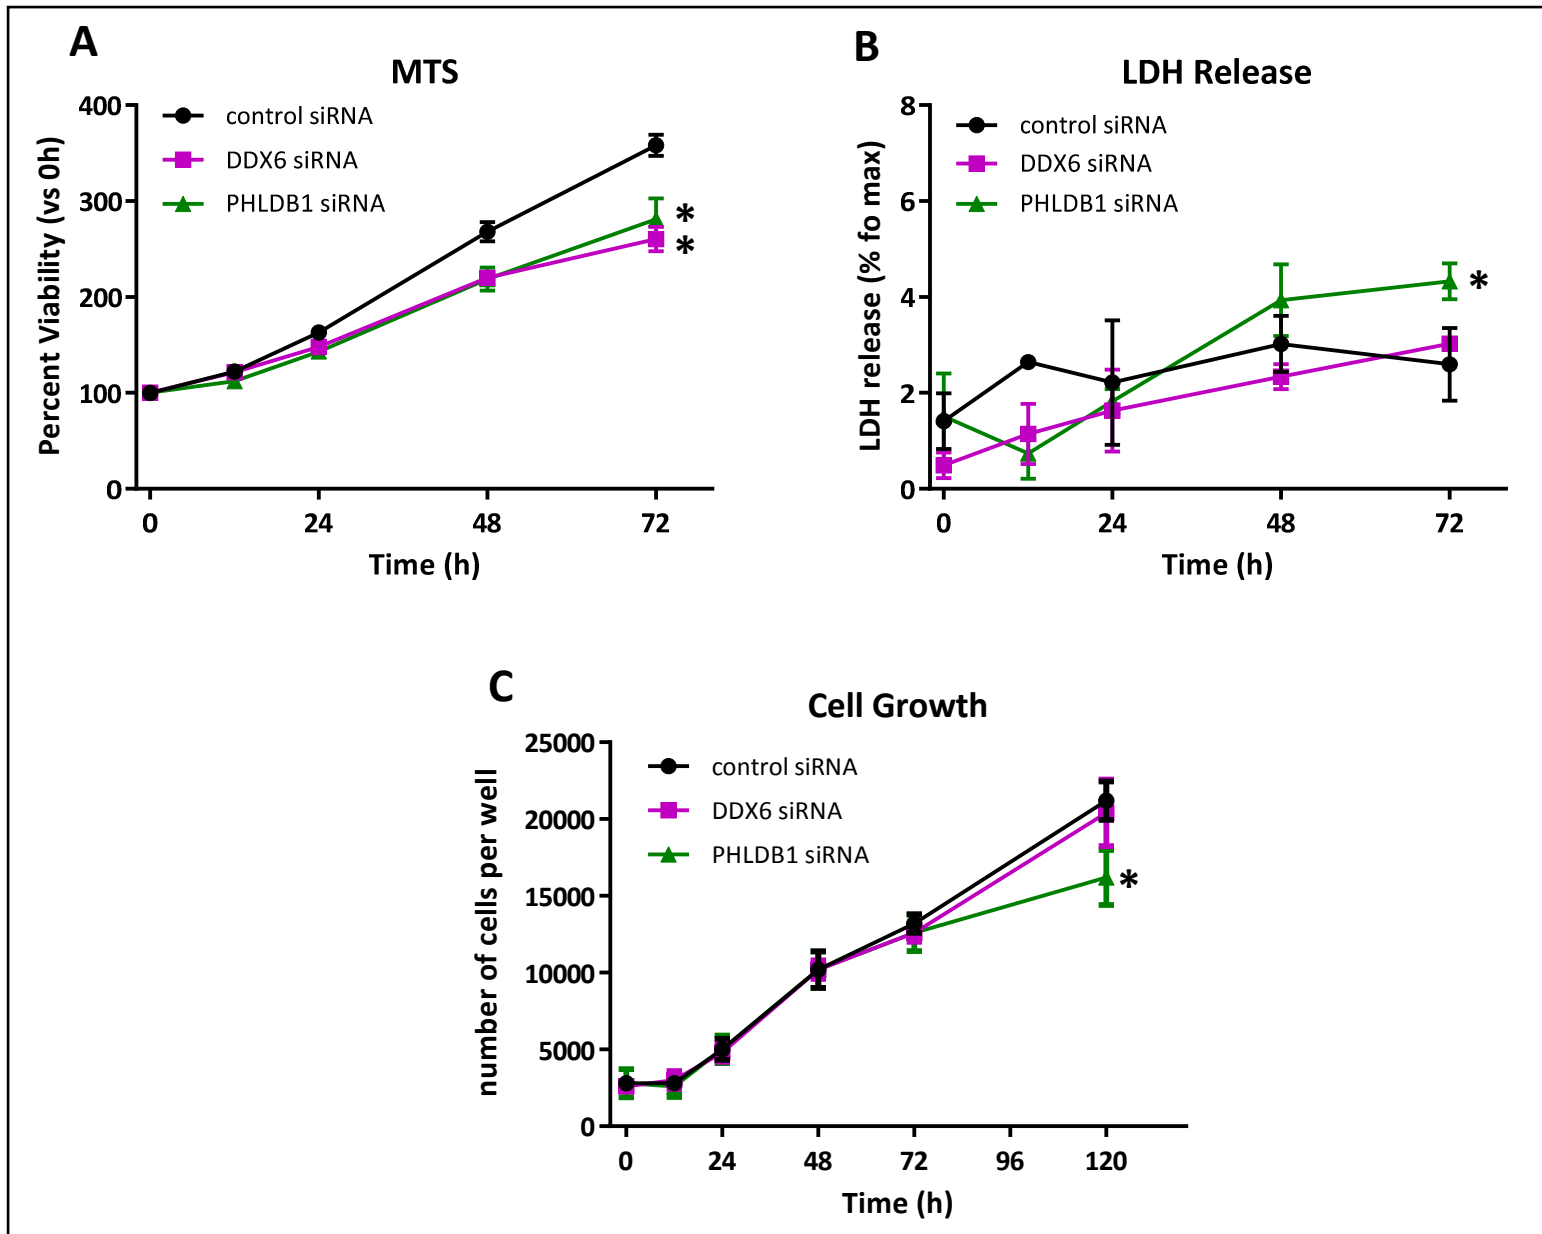

**Supplementary Figure 5: Cell proliferation, cytotoxicity and viability assays.** Cell proliferation (A) and LDH release (B) were measured up to 72h post-transfection. Cell viability (C) was measured by cell counts up to 120h post-transfection.

Supplementary Table 1: All candidate SNPs in the 11q23.3 locus

| RSID        | R <sup>2</sup> to rs498872 | Chromosome | Coordinate_HG19 | Allele | MAF       | Functional Evidence from Database Search? | Overlapping biofeatures in brain                       |
|-------------|----------------------------|------------|-----------------|--------|-----------|-------------------------------------------|--------------------------------------------------------|
| rs1715445   | 0.222                      | chr11      | 118119187       | C/T    | 0.195288  |                                           |                                                        |
| rs12275284  | 0.227                      | chr11      | 118129727       | A/T    | 0.318091  |                                           |                                                        |
| rs576950    | 0.235                      | chr11      | 118391375       | C/T    | 0.214257  |                                           |                                                        |
| rs4938513   | 0.291                      | chr11      | 118419704       | C/T    | 0.267372  |                                           |                                                        |
| rs542266    | 0.229                      | chr11      | 118422240       | A/C    | 0.292732  |                                           |                                                        |
| rs633308    | 0.341                      | chr11      | 118459069       | C/T    | 0.266973  |                                           |                                                        |
| rs10736492  | 0.253                      | chr11      | 118459269       | A/G    | 0.368411  |                                           |                                                        |
| rs498872    | 1                          | chr11      | 118477367       | C/T    | 0.245607  |                                           |                                                        |
| rs7125115   | 0.268                      | chr11      | 118478330       | A/G    | 0.440096  | +                                         | NHA_H3K27ac_NHA_H3K4me1                                |
| rs12225399  | 0.241                      | chr11      | 118480285       | C/G    | 0.377995  | +                                         | NHA_H3K27ac_NHA_H3K4me1_NHA_H3K4me3_NHA_DNaseI_HS_peak |
| rs10892246  | 0.262                      | chr11      | 118481431       | A/G    | 0.361422  | +                                         | NHA_H3K27ac_NHA_H3K4me1_NHA_H3K4me3                    |
| rs112959066 | 0.386                      | chr11      | 118482565       | A/T    | 0.172923  | +                                         | NHA_H3K27ac_NHA_H3K4me1                                |
| rs45540840  | 0.507                      | chr11      | 118486110       | A/G    | 0.242212  | +                                         | NHA_H3K27ac_NHA_H3K4me1_NHA_DNaseI_HS_peak             |
| rs11216930  | 0.507                      | chr11      | 118488782       | A/C    | 0.245208  | +                                         | NHA_H3K27ac_NHA_H3K4me1_NHA_H3K4me3                    |
| rs10892247  | 0.507                      | chr11      | 118490076       | A/G    | 0.20008   | +                                         | NHA_H3K27ac_NHA_H3K4me1_NHA_H3K4me3                    |
| rs77683570  | 0.477                      | chr11      | 118495287       | C/T    | 0.203874  | +                                         | NHA_H3K27ac_NHA_H3K4me1                                |
| rs45565037  | 0.477                      | chr11      | 118496119       | A/G    | 0.221046  | +                                         | NHA_H3K27ac_NHA_H3K4me1                                |
| rs2236661   | 0.477                      | chr11      | 118499394       | C/G    | 0.221645  | +                                         | NHA_H3K4me1                                            |
| rs10892248  | 0.477                      | chr11      | 118501022       | A/G    | 0.23103   | +                                         | NHA_H3K4me1                                            |
| rs11216937  | 0.477                      | chr11      | 118507478       | C/T    | 0.204872  | +                                         |                                                        |
| rs11216938  | 0.477                      | chr11      | 118514625       | C/T    | 0.220447  | +                                         |                                                        |
| rs10790255  | 0.378                      | chr11      | 118515579       | G/T    | 0.311302  | +                                         |                                                        |
| rs12362152  | 0.477                      | chr11      | 118516737       | A/G    | 0.232228  |                                           |                                                        |
| rs117748    | 0.477                      | chr11      | 118528424       | C/T    | 0.203874  | +                                         |                                                        |
| rs7928371   | 0.477                      | chr11      | 118529127       | A/G    | 0.220048  | +                                         |                                                        |
| rs2276065   | 0.477                      | chr11      | 118530611       | C/T    | 0.216853  | +                                         |                                                        |
| rs10790256  | 0.477                      | chr11      | 118534082       | C/T    | 0.197085  | +                                         | NHA_H3K27me3                                           |
| rs12225548  | 0.477                      | chr11      | 118535840       | C/G    | 0.203674  | +                                         | NHA_H3K27me3                                           |
| rs10892251  | 0.413                      | chr11      | 118543563       | C/T    | 0.207668  | +                                         | NHA_H3K27me3                                           |
| rs2277296   | 0.383                      | chr11      | 118550522       | C/T    | 0.226438  | +                                         | NHA_H3K27me3                                           |
| rs2277297   | 0.383                      | chr11      | 118550524       | C/T    | 0.226238  | +                                         | NHA_H3K27me3                                           |
| rs10892252  | 0.383                      | chr11      | 118555692       | A/G    | 0.207268  | +                                         | NHA_H3K27me3                                           |
| rs11216943  | 0.383                      | chr11      | 118556398       | A/G    | 0.216853  | +                                         | NHA_H3K27me3                                           |
| rs73001406  | 0.383                      | chr11      | 118560857       | A/G    | 0.229233  | +                                         | NHA_H3K27ac_NHA_H3K4me1_NHA_H3K4me3_NHA_DNaseI_HS_peak |
| rs11216956  | 0.266                      | chr11      | 118575326       | A/G    | 0.19988   |                                           |                                                        |
| rs947931    | 0.209                      | chr11      | 118577614       | A/C    | 0.0924521 | +                                         | NHA_H3K27me3                                           |
| rs11216960  | 0.266                      | chr11      | 118577873       | A/G    | 0.186102  | +                                         | NHA_H3K27me3                                           |
| rs10892256  | 0.266                      | chr11      | 118578705       | A/G    | 0.186502  | +                                         | NHA_H3K27me3                                           |
| rs10892257  | 0.266                      | chr11      | 118579327       | A/G    | 0.186901  | +                                         | NHA_H3K27me3                                           |
| rs10790261  | 0.266                      | chr11      | 118579747       | A/G    | 0.182109  | +                                         | NHA_H3K27me3                                           |
| rs10892258  | 0.266                      | chr11      | 118579865       | A/G    | 0.186701  | +                                         | NHA_H3K27me3                                           |
| rs11216961  | 0.266                      | chr11      | 118580338       | C/G    | 0.186901  |                                           |                                                        |
| rs11216964  | 0.266                      | chr11      | 118581895       | A/G    | 0.186701  |                                           |                                                        |
| rs10892259  | 0.266                      | chr11      | 118583002       | A/G    | 0.186302  |                                           |                                                        |
| rs10892260  | 0.266                      | chr11      | 118583525       | A/C    | 0.173323  | +                                         |                                                        |
| rs11216972  | 0.265                      | chr11      | 118585826       | C/T    | 0.182308  |                                           |                                                        |
| rs10892263  | 0.219                      | chr11      | 118587319       | C/T    | 0.169529  |                                           |                                                        |
| rs10892271  | 0.292                      | chr11      | 118598544       | A/G    | 0.198682  |                                           |                                                        |
| rs10892272  | 0.292                      | chr11      | 118602707       | C/G    | 0.213858  |                                           |                                                        |
| rs10892273  | 0.292                      | chr11      | 118602809       | A/G    | 0.213858  |                                           |                                                        |
| rs73001429  | 0.292                      | chr11      | 118603165       | G/T    | 0.236422  |                                           |                                                        |
| rs11216993  | 0.292                      | chr11      | 118603495       | A/T    | 0.224641  |                                           |                                                        |
| rs11216994  | 0.292                      | chr11      | 118603520       | C/T    | 0.235623  |                                           |                                                        |
| rs11216995  | 0.292                      | chr11      | 118603526       | A/G    | 0.235623  |                                           |                                                        |
| rs11216998  | 0.262                      | chr11      | 118604837       | C/T    | 0.260583  |                                           |                                                        |
| rs11216999  | 0.218                      | chr11      | 118604941       | C/T    | 0.259784  |                                           |                                                        |
| rs11217000  | 0.292                      | chr11      | 118604984       | A/G    | 0.169129  |                                           |                                                        |
| rs10892274  | 0.274                      | chr11      | 118605463       | C/T    | 0.287141  |                                           |                                                        |
| rs11217001  | 0.238                      | chr11      | 118607046       | A/G    | 0.160543  |                                           |                                                        |
| rs77209083  | 0.208                      | chr11      | 118607569       | A/G    | 0.157548  |                                           |                                                        |
| rs7945144   | 0.236                      | chr11      | 118608716       | A/G    | 0.288339  |                                           |                                                        |
| rs11826521  | 0.208                      | chr11      | 118610549       | G/T    | 0.159145  | +                                         | NHA_H3K27me3                                           |
| rs6589684   | 0.208                      | chr11      | 118610957       | A/G    | 0.227636  | +                                         | NHA_H3K27me3                                           |
| rs10892279  | 0.208                      | chr11      | 118611781       | A/G    | 0.24746   | +                                         |                                                        |
| rs10892280  | 0.208                      | chr11      | 118611817       | C/T    | 0.159145  | +                                         |                                                        |
| rs6589685   | 0.208                      | chr11      | 118612197       | C/T    | 0.280351  |                                           |                                                        |
| rs6589686   | 0.208                      | chr11      | 118612565       | A/G    | 0.274161  |                                           |                                                        |
| rs2155433   | 0.208                      | chr11      | 118612921       | C/T    | 0.274361  |                                           |                                                        |
| rs56758835  | 0.208                      | chr11      | 118615340       | A/G    | 0.15615   |                                           |                                                        |
| rs1048024   | 0.208                      | chr11      | 118618776       | A/T    | 0.158546  | +                                         |                                                        |
| rs2077579   | 0.208                      | chr11      | 118619047       | G/T    | 0.158746  | +                                         |                                                        |
| rs20404781  | 0.236                      | chr11      | 118619253       | C/T    | 0.15595   | +                                         |                                                        |
| rs3889239   | 0.208                      | chr11      | 118619960       | A/G    | 0.15595   | +                                         |                                                        |
| rs10892286  | 0.208                      | chr11      | 118642085       | A/C    | 0.158546  | +                                         | NHA_H3K27ac_NHA_H3K4me1                                |
| rs10892287  | 0.208                      | chr11      | 118642999       | C/T    | 0.159545  |                                           |                                                        |
| rs10892288  | 0.208                      | chr11      | 118644694       | A/G    | 0.158347  |                                           |                                                        |
| rs10892289  | 0.208                      | chr11      | 118646003       | C/T    | 0.155751  |                                           |                                                        |
| rs56043232  | 0.208                      | chr11      | 118648373       | C/T    | 0.155751  |                                           |                                                        |
| rs73003215  | 0.208                      | chr11      | 118649512       | A/G    | 0.275759  |                                           |                                                        |
| rs57494551  | 0.208                      | chr11      | 118661398       | C/T    | 0.154752  | +                                         | NHA_H3K27ac_NHA_H3K4me3                                |
| rs10892293  | 0.208                      | chr11      | 118665575       | A/T    | 0.141973  | +                                         |                                                        |
| rs10892294  | 0.208                      | chr11      | 118667357       | C/G    | 0.17492   |                                           |                                                        |
| rs11217032  | 0.208                      | chr11      | 118669605       | A/T    | 0.147963  | +                                         | NHA_H3K27me3                                           |
| rs11217033  | 0.208                      | chr11      | 118673706       | C/T    | 0.147764  | +                                         | NHA_H3K27me3                                           |
| rs11217040  | 0.208                      | chr11      | 118680648       | A/C    | 0.22504   | +                                         | NHA_H3K27me3                                           |
| rs73005423  | 0.233                      | chr11      | 118681079       | A/G    | 0.15595   | +                                         | NHA_H3K27me3                                           |
| rs73005426  | 0.233                      | chr11      | 118681083       | A/G    | 0.227835  | +                                         | NHA_H3K27me3                                           |
| rs7942535   | 0.208                      | chr11      | 118681464       | C/T    | 0.22524   | +                                         | NHA_H3K27me3                                           |
| rs11217042  | 0.208                      | chr11      | 118682528       | A/G    | 0.22524   | +                                         | NHA_H3K27me3                                           |
| rs80065107  | 0.208                      | chr11      | 118682767       | G/T    | 0.234824  | +                                         | NHA_H3K27me3                                           |
| rs76704408  | 0.208                      | chr11      | 118683327       | G/T    | 0.234824  | +                                         | NHA_H3K27me3                                           |
| rs17122453  | 0.208                      | chr11      | 118683564       | A/G    | 0.22504   | +                                         | NHA_H3K27me3                                           |
| rs715412    | 0.208                      | chr11      | 118684610       | A/G    | 0.144569  | +                                         | NHA_H3K27me3                                           |
| rs7123726   | 0.234                      | chr11      | 118694547       | C/T    | 0.230232  |                                           |                                                        |
| rs4936441   | 0.213                      | chr11      | 118725660       | C/G    | 0.194888  |                                           |                                                        |
| rs4938572   | 0.213                      | chr11      | 118740931       | C/T    | 0.229633  | +                                         |                                                        |

| Supplementary Table 2: MATCH TFBS Analysis |               |                    |
|--------------------------------------------|---------------|--------------------|
| SNP                                        | Factor Name   | Allele Specificity |
| rs7125115                                  | Elk-1         |                    |
|                                            | Oct-1         |                    |
|                                            | Ik-1          |                    |
|                                            | HNF-4         |                    |
|                                            | RFX1          |                    |
|                                            | c-Rel         |                    |
|                                            | HNF-3beta     | Minor              |
|                                            | c-Myb         |                    |
|                                            | FOXD3         | Minor              |
|                                            | v-Myb         |                    |
| Pax-4                                      |               |                    |
| rs12225399                                 | myogenin/NF-1 |                    |
|                                            | R             | Major              |
|                                            | Pax-4         |                    |
|                                            | USF           |                    |
|                                            | N-Myc         |                    |
|                                            | c-Myc/Max     |                    |
| rs45540840                                 | GATA-3        |                    |
|                                            | Evi-1         |                    |
|                                            | Oct-1         | Major              |
|                                            | GATA-1        | Major              |
|                                            | HNF-4         | Major              |
|                                            | GATA-2        | Major              |
|                                            | Pax-4         |                    |
|                                            | Lmo2_complex  | Major              |
|                                            | GATA-X        | Major              |
|                                            | Hand1/E47     |                    |
| ARP-1                                      | Minor         |                    |
| rs11216930                                 | Oct-1         |                    |
|                                            | HNF-4         |                    |
|                                            | Oct-1         |                    |
| rs10892247                                 | Hand1/E47     |                    |
|                                            | Hand1/E47     |                    |
|                                            | HNF-4         |                    |
|                                            | Hand1/E47     |                    |
|                                            | GATA-3        | Major              |
|                                            | v-Maf         |                    |
|                                            | CP2           |                    |
|                                            | GATA-X        |                    |
|                                            | c-Rel         |                    |
|                                            | CP2           |                    |
| GATA-2                                     |               |                    |
| c-Ets-1(p54)                               | Minor         |                    |
| rs2236661                                  | Hand1/E47     |                    |
|                                            | myogenin/NF-1 |                    |
|                                            | Staf          |                    |
|                                            | COMP1         |                    |
|                                            | CDP CR1       |                    |
|                                            | USF           | Major              |
| rs10892248                                 | Oct-1         |                    |
|                                            | Pax-4         |                    |
|                                            | AREB6         |                    |
|                                            | AP-1          |                    |
|                                            | GATA-X        |                    |
|                                            | GATA-1        |                    |
| rs73001406                                 | Lmo2          |                    |
|                                            | c-Rel         |                    |
|                                            | COMP1         |                    |
|                                            | Elk-1         |                    |
|                                            | HNF-1         |                    |
|                                            | Hand1/E47     |                    |
|                                            | Pax-6         | Major              |
|                                            | Pax-4         |                    |
|                                            | Ik-1          |                    |
|                                            | Ik-3          |                    |
| Oct-1                                      |               |                    |
| N-Myc                                      | Major         |                    |
| USF                                        | Major         |                    |
| AP-1                                       |               |                    |
| rs10790261                                 | COMP1         |                    |
|                                            | Hand1/E47     | Major              |
|                                            | Olf-1         | Major              |
|                                            | SOX-9         |                    |
|                                            | NF-Y          |                    |
| c-Ets-1(p54)                               | Minor         |                    |
| rs10892258                                 | Pax-4         |                    |
|                                            | CDP CR1       |                    |
|                                            | Evi-1         |                    |
|                                            | Pax-6         | Minor              |
|                                            | AP-1          |                    |
|                                            | HNF-4         |                    |
|                                            | ER            |                    |
|                                            | Oct-1         |                    |
|                                            | FOXD3         |                    |
|                                            | HNF-1         |                    |
| HLF                                        |               |                    |
| rs57494551                                 | myogenin/NF-1 | Major              |
|                                            | COMP1         | Major              |
|                                            | Evi-1         |                    |
|                                            | Oct-1         |                    |
|                                            | Elk-1         |                    |



**Supplementary Table 3: Enhancer scanning tile primers**

| <b>Amplicon name</b> | <b>FW Primer</b>     | <b>REV Primer</b>     | <b>Amplicon Size</b> | <b>SNPs covered</b>                       | <b>BAC</b>  |
|----------------------|----------------------|-----------------------|----------------------|-------------------------------------------|-------------|
| 11A                  | CTAGAGTCTCGCTCCTCAAA | CGGGAGAGTCTGGATAGG    | 1835                 | rs498872 rs7125115                        | RP11-45N4   |
| 11B                  | CACAAGGGCGTCTTCTTT   | GAGGTTTCCGCAAGGTAG    | 2347                 | rs7125115 rs12225399                      | RP11-45N4   |
| 11C                  | ACACACAGCCCAGTTATAC  | AGCTGTGGTGTGCTCATT    | 2272                 | rs12225399 rs10892246                     | RP11-45N4   |
| 11D                  | TTGGATCAGTTACTGTGC   | GGGTTCTTAATTGGCTAGGT  | 1868                 | rs112959066                               | RP11-45N4   |
| 11E                  | GTGACTGGTTTAGGGTGGTA | TTTGGGTTATATTCGTGACC  | 2223                 | rs45540840                                | RP11-45N4   |
| 11F                  | CAAGTAGCTGGGATTACAGG | GAGGAAAAAGGAAGAACCAT  | 2137                 | rs11216930 rs10892247                     | RP11-45N4   |
| 11G                  | GTGTGTGAGAGACGGAGTTT | CAAACAGCTAAGGGAGTGAC  | 2102                 | rs77683570 rs45565037                     | RP11-45N4   |
| 11H                  | CAGGGAAGTGGCAGAGAGTC | CCCACCCAGATACAGTCACC  | 2116                 | rs2236661 rs10892248                      | RP11-45N4   |
| 11I                  | GCGCTCACCAGTAGTAGAAC | GGGCCATTGTACAGAGAAT   | 1894                 | rs10790256                                | RP11-45N4   |
| 11J                  | TTGGGCAGTAAAGTACCTGT | CCACTGTATTGGGTAGGAAA  | 1952                 | rs12225548                                | RP11-45N4   |
| 11K                  | AAGCATGCCTACAGGATCTA | TGCAAATGCTCAAAAATACTG | 1768                 | rs10892251                                | RP11-45N4   |
| 11L                  | CTCTAACACACCCTCTGCTC | TGAAACCCCGTCTCTACTAA  | 2147                 | rs2277296 rs2277297                       | RP11-45N4   |
| 11M                  | AATGCCCTGTTTTATTTTGA | CCTGTAGTCCAGCTATTTG   | 2160                 | rs10892252 rs11216943                     | RP11-45N4   |
| 11N                  | CTAAGACCCGGTGACAAAT  | GTAGGACTAGGGACGGGATA  | 1816                 | rs73001406                                | RP11-45N4   |
| 11O                  | AGATGTCATTGTCCCTTGAG | AAAGTTTGCTTCCCATTGTA  | 2437                 | rs947931 rs11216960 rs10892256 rs10892257 | RP11-45N4   |
| 11P                  | CATCTCTGACCAGGAACATT | GCACTGTAGTCCCAGCTAC   | 1843                 | rs10790261 rs10892258                     | RP11-45N4   |
| 11Q                  | CATGGTGAAACCTCATCTCT | TCATGACCACAAAAGAAAA   | 2220                 | rs11826521 rs6589684                      | RP11-45N4   |
| 11R                  | TGACATTTGTCCCTTCTATG | TTTATCCAGTCATCAGTTGG  | 1901                 | rs10892286                                | RP11-45N4   |
| 11S                  | ACCTCTAAAGACCGAACGA  | CAAGATACGCCCTCACAG    | 2468                 | rs57494551                                | CTD-2333F20 |
| 11T                  | AGGCTGCAGTGAGTTATGAT | CTGAGGATAAACAGGAGCAC  | 1836                 | rs11217032                                | CTD-2333F20 |
| 11U                  | TTTCAAATGCTGTTGTCAAG | AGCAAGATCCTGTCTCAGAA  | 2173                 | rs76704408 rs17122453 rs715412            | CTD-2333F20 |
| NEGATIVE             | TCTACCTGGGACTCATTGAC | CCCTTGGCTTCACTCTAA    | 1784                 | n/a                                       | RP11-45N4   |

**attB sites are added to each FW and REV primer as follows:**

attB FW

5' GGGGACAAGTTTGTACAAAAAAGCAGGCTACGCGT

attB REV

5' GGGGACCACTTTGTACAAGAAAGCTGGGCTCGAG

**Supplementary Table 4: EMSA probes**

|            |           |                                                         |
|------------|-----------|---------------------------------------------------------|
| rs498872   | major FW  | 5'- CTTGCAAAGCCAGCTCTTGG <b>C</b> CCAGGAGACTGGCTGGGGAG  |
| rs498872   | major REV | 5'- CTCCCCAGCCAGTCTCTGG <b>G</b> CCAAGAGCTGGCTTTGCAAG   |
| rs498872   | minor FW  | 5'- CTTGCAAAGCCAGCTCTTGG <b>T</b> CCAGGAGACTGGCTGGGGAG  |
| rs498872   | minor REV | 5'- CTCCCCAGCCAGTCTCTGG <b>A</b> CCAAGAGCTGGCTTTGCAAG   |
| rs7125115  | major FW  | 5'- AGCTCCCGGGGAAAAGCAAC <b>G</b> GTGTCCTCCTAAGCCTGAGG  |
| rs7125115  | major REV | 5'- CCTCAGGCTTAGGAGGACAC <b>C</b> GTTGCTTTTCCCCGGGAGCT  |
| rs7125115  | minor FW  | 5'- AGCTCCCGGGGAAAAGCAAC <b>A</b> GTGTCCTCCTAAGCCTGAGG  |
| rs7125115  | minor REV | 5'- CCTCAGGCTTAGGAGGACACT <b>T</b> GTTGCTTTTCCCCGGGAGCT |
| rs12225399 | major FW  | 5'- CAGCTCACACCGCAGCCCCA <b>G</b> CTCACACACGCGGCCCTCA   |
| rs12225399 | major REV | 5'- TGAGGGGCGCGTGTGTGAG <b>C</b> TGGGGCTGCGGTGTGAGCTG   |
| rs12225399 | minor FW  | 5'- CAGCTCACACCGCAGCCCCA <b>C</b> CTCACACACGCGGCCCTCA   |
| rs12225399 | minor REV | 5'- TGAGGGGCGCGTGTGTGAG <b>G</b> TGGGGCTGCGGTGTGAGCTG   |
| rs45540840 | major FW  | 5'- AGGGCAAGATCTCCAAGAT <b>G</b> AGGCCCTGGCACAGCCCCCT   |
| rs45540840 | major REV | 5'- AGGGGGCTGTGCCAGGGC <b>C</b> TATCTTGGGAGATCTTGCCT    |
| rs45540840 | minor FW  | 5'- AGGGCAAGATCTCCAAGAT <b>A</b> AGGCCCTGGCACAGCCCCCT   |
| rs45540840 | minor REV | 5'- AGGGGGCTGTGCCAGGGC <b>T</b> ATCTTGGGAGATCTTGCCT     |
| rs11216930 | major FW  | 5'- TAGTCCCTGAGAAGGGGAG <b>A</b> GCCTAGGGCTAAGATGGAAT   |
| rs11216930 | major REV | 5'- ATTCCATCTTAGCCCTAGG <b>C</b> TCTCCCTTCTCAGGGAGCTA   |
| rs11216930 | minor FW  | 5'- TAGTCCCTGAGAAGGGGAG <b>G</b> GCCTAGGGCTAAGATGGAAT   |
| rs11216930 | minor REV | 5'- ATTCCATCTTAGCCCTAGG <b>G</b> CTCCCTTCTCAGGGAGCTA    |
| rs10892247 | major FW  | 5'- AGGAGTGTGGCTGGGGAG <b>C</b> CGATCTCTGGGTATCCAGC     |
| rs10892247 | major REV | 5'- GCTGGATAACCCAGAGAT <b>C</b> GGCTCCCCAGCCACACTCCT    |
| rs10892247 | minor FW  | 5'- AGGAGTGTGGCTGGGGAG <b>C</b> AGATCTCTGGGTATCCAGC     |
| rs10892247 | minor REV | 5'- GCTGGATAACCCAGAGAT <b>T</b> GGCTCCCCAGCCACACTCCT    |
| rs2236661  | major FW  | 5'- CAGAGACTCTGCCATGGACA <b>C</b> TGGCAAGCCTCCCTGGCACC  |
| rs2236661  | major REV | 5'- GGTGCCAGGGAGGCTTGCCA <b>G</b> TGTCCATGGCAGAGTCTCTG  |
| rs2236661  | minor FW  | 5'- CAGAGACTCTGCCATGGACA <b>G</b> TGGCAAGCCTCCCTGGCACC  |
| rs2236661  | minor REV | 5'- GGTGCCAGGGAGGCTTGCCA <b>C</b> TGTCCATGGCAGAGTCTCTG  |
| rs10892248 | major FW  | 5'- CCTTTACCTCCTAGGCC <b>C</b> TGAGAGGTGACTGTATCTGGGT   |
| rs10892248 | major REV | 5'- ACCCAGATACAGTCACT <b>C</b> TAGGGGCCTAGGAGGTAAGG     |
| rs10892248 | minor FW  | 5'- CCTTTACCTCCTAGGCC <b>C</b> AAGAGGTGACTGTATCTGGGT    |
| rs10892248 | minor REV | 5'- ACCCAGATACAGTCACT <b>T</b> AGGGGCCTAGGAGGTAAGG      |
| rs73001406 | major FW  | 5'- AGAAGGTTCCAGACATT <b>C</b> CGTGACTGTGGGTGGGGCTGGA   |
| rs73001406 | major REV | 5'- TCCAGCCCCACCCACAGT <b>C</b> AGGGAATGTCTGGAACCTTCT   |
| rs73001406 | minor FW  | 5'- AGAAGGTTCCAGACATT <b>C</b> ATGACTGTGGGTGGGGCTGGA    |
| rs73001406 | minor REV | 5'- TCCAGCCCCACCCACAGT <b>C</b> TGGGAATGTCTGGAACCTTCT   |
| rs10790261 | major FW  | 5'- AATGTACAAGATGTGT <b>C</b> CAAGTCCAATGGTAGACATCCT    |
| rs10790261 | major REV | 5'- AGGATGTCTACCATTGGG <b>A</b> CTGGAGACACATCTGTACATT   |
| rs10790261 | minor FW  | 5'- AATGTACAAGATGTGT <b>C</b> CGTCCAATGGTAGACATCCT      |
| rs10790261 | minor REV | 5'- AGGATGTCTACCATTGGG <b>A</b> CGGAGACACATCTGTACATT    |
| rs10892258 | major FW  | 5'- CTGAGGATCAGTCAAG <b>C</b> TAGAGCAAGATTGAATAACCCCT   |
| rs10892258 | major REV | 5'- AGGGGTTATTCAATCTT <b>G</b> CTGAGCTTACTGATCCTCAG     |
| rs10892258 | minor FW  | 5'- CTGAGGATCAGTCAAG <b>C</b> AAGCAAGATTGAATAACCCCT     |
| rs10892258 | minor REV | 5'- AGGGGTTATTCAATCTT <b>T</b> GAGCTTACTGATCCTCAG       |
| rs57494551 | major FW  | 5'- ACCCTGCTGCGCACCACAT <b>T</b> CTATATTCGCTCCTCTCAG    |
| rs57494551 | major REV | 5'- CTGAGAGGAGGCGAATATAG <b>G</b> AATGTGGTGCAGCAGGGT    |
| rs57494551 | minor FW  | 5'- ACCCTGCTGCGCACCACAT <b>T</b> CTATATTCGCTCCTCTCAG    |
| rs57494551 | minor REV | 5'- CTGAGAGGAGGCGAATATAG <b>A</b> AATGTGGTGCAGCAGGGT    |

**Supplementary Table 5: 3C primers**

| <b>Hg19 chr11 coordinate</b> | <b>Primer name</b>     | <b>Sequence</b>                     |
|------------------------------|------------------------|-------------------------------------|
| 118559230                    | Bait                   | 5'-CGAACCACCAGCGGCAATC              |
| 118559075                    | Adjacent               | 5'-CTCGTGGTTTCGCTGGCTTC             |
| 118587850                    | 1                      | 5'-GGCCCCACCCCTATCTCTCT             |
| 118605130                    | 2                      | 5'-AGACAGCCCCGTTCCAACAT             |
| 118622535                    | 3                      | 5'-TTCTGGGGAAAGGGGACAAGG            |
| 118633460                    | 4                      | 5'-AGTCCTGGGATCTAGCCATGT            |
| 118651050                    | 5                      | 5'-GAGCCGAGATCACGCCACT              |
| 118663145                    | 6                      | 5'-GAAAGTAGGGGCGGAGGAGG             |
| 118546270                    | 7                      | 5'-GCACCCCTTCATTTGGCTGA             |
| 118504220                    | 8                      | 5'-GAGGGCAGGCAGGGGAATAG             |
| 118489020                    | 9                      | 5'-GGGGAGGACTGGGGAGAAGA             |
| 118475695                    | 10                     | 5'-GCCCCTGTCCTGGTTTGTA              |
|                              | control primer 1 (FW)  | 5'-GTTTCATCTTGCTGCCAGAAATGCCGAGCCTG |
|                              | control primer 2 (REV) | 5'-ATCCCAGCTGTCTGTAGCTTTAGAAAGTGGG  |

**Supplementary Table 6: 3C results**

Raw Data: DNA Quantification

| Adjacent | 1        | 2        | 3        | 4        | 5        | 6        | 7        | 8        | 9        | 10       |
|----------|----------|----------|----------|----------|----------|----------|----------|----------|----------|----------|
| 0.01857  | 2.55E-06 | 8.25E-05 | 0.001712 | 0.010903 | 0.235545 | 0.034679 | 1.12E-05 | 0.001401 | 3.28E-04 | 0        |
| 0.014368 | 1.82E-08 | 1.57E-04 | 0.007697 | 4.09E-05 | 0.481944 | 0.034549 | 1.28E-06 | 4.52E-04 | 5.13E-04 | 0        |
| 0.020004 | 1.02E-08 | 2.56E-05 | 0.003734 | 1.71E-05 | 0.347292 | 0.02223  | 6.65E-06 | 7.21E-04 | 0.001735 | 3.32E-07 |
| 0.014552 | 2.46E-08 | 1.63E-04 | 0.004199 | 1.50E-05 | 0.364878 | 0.024361 | 1.40E-05 | 0.001511 | 3.86E-04 | 0        |
| 0.022799 | 2.80E-08 | 2.49E-04 | 0.005069 | 4.51E-05 | 1.004076 | 0.100759 | 6.34E-05 | 0.001047 | 4.08E-04 | 3.55E-07 |
| 0.019766 | 2.28E-08 | 1.68E-04 | 0.005562 | 1.18E-04 | 0.805752 | 0.089343 | 4.45E-05 | 6.69E-04 | 8.92E-04 | 2.56E-07 |

Normalized against adjacent

| Adjacent | 1        | 2        | 3        | 4        | 5        | 6        | 7        | 8        | 9        | 10       |
|----------|----------|----------|----------|----------|----------|----------|----------|----------|----------|----------|
| 1.012367 | 0.000139 | 0.004498 | 0.093348 | 0.594392 | 12.84099 | 1.890556 | 0.000608 | 0.076387 | 0.017905 | 0        |
| 0.783308 | 9.92E-07 | 0.008546 | 0.419619 | 0.002229 | 26.27371 | 1.883503 | 7E-05    | 0.024621 | 0.027948 | 0        |
| 1.090555 | 5.56E-07 | 0.001394 | 0.203582 | 0.00093  | 18.93302 | 1.21188  | 0.000363 | 0.039317 | 0.094558 | 1.81E-05 |
| 0.793317 | 1.34E-06 | 0.008885 | 0.228922 | 0.000818 | 19.8917  | 1.328072 | 0.000761 | 0.082376 | 0.021026 | 0        |
| 1.242914 | 1.53E-06 | 0.01358  | 0.276326 | 0.00246  | 54.73827 | 5.492986 | 0.003454 | 0.057097 | 0.02226  | 1.93E-05 |
| 1.077539 | 1.24E-06 | 0.009167 | 0.303221 | 0.006434 | 43.92647 | 4.870604 | 0.002427 | 0.036473 | 0.048639 | 1.39E-05 |
